# Supplementary material for: The Complex Interplay between Serum Testosterone and the Clinical Course of Coronavirus Disease 19 Pandemic: A Systematic Review of Clinical and Preclinical Evidence
Source: PubMed Central journal article supplement — World J Mens Health. 2023 Jan 3;41(3):466–81. doi: 10.5534/wjmh.220143 (PMC10307667; doi:10.5534/wjmh.220143), 2023-01-03
Supplement: wjmh-41-466-s001.pdf [file wjmh-41-466-s001.pdf]

| Study                          | Risk of bias domains |    |    |    |    |    |    | Overall |
|--------------------------------|----------------------|----|----|----|----|----|----|---------|
|                                | D1                   | D2 | D3 | D4 | D5 | D6 | D7 |         |
| Rastrelli et al, 2021 [46]     | ⊖                    | ⊕  | ⊖  | ⊕  | ⊕  | ⊕  | ⊖  | ⊖       |
| Ma et al, 2021 [48]            | ⊕                    | ⊕  | ⊖  | ⊕  | ⊕  | ⊖  | ⊕  | ⊕       |
| Çayan et al, 2020 [49]         | ⊖                    | ⊕  | ⊕  | ⊖  | ⊕  | ⊕  | ⊖  | ⊕       |
| Saliccia et al, 2020 [50]      | ⊕                    | ⊖  | ⊕  | ⊕  | ⊕  | ⊖  | ⊕  | ⊕       |
| Ruan et al, 2021 [22]          | ⊖                    | ⊕  | ⊕  | ⊕  | ⊖  | ⊖  | ⊕  | ⊖       |
| Yeap et al, 2022 [40]          | ⊕                    | ⊕  | ⊖  | ⊕  | ⊕  | ⊕  | ⊕  | ⊕       |
| Xu et al, 2021 [23]            | ⊖                    | ⊖  | ⊕  | ⊖  | ⊕  | ⊖  | ⊕  | ⊖       |
| Okçelik, 2021 [71]             | ⊕                    | ⊕  | ⊖  | ⊕  | ⊖  | ⊖  | ⊕  | ⊕       |
| Temiz et al, 2021 [72]         | ⊕                    | ⊖  | ⊕  | ⊕  | ⊕  | ⊕  | ⊖  | ⊕       |
| Kadihasanoglu et al, 2021 [51] | ⊕                    | ⊕  | ⊕  | ⊖  | ⊕  | ⊕  | ⊖  | ⊕       |
| Salonia et al, 2021 [24]       | ⊖                    | ⊕  | ⊕  | ⊖  | ⊕  | ⊕  | ⊖  | ⊕       |
| Saliccia et al, 2021 [64]      | ⊖                    | ⊕  | ⊕  | ⊕  | ⊕  | ⊖  | ⊕  | ⊖       |
| Camici et al, 2021 [52]        | ⊕                    | ⊕  | ⊕  | ⊖  | ⊕  | ⊖  | ⊕  | ⊕       |
| Dhindsa et al, 2021 [53]       | ⊖                    | ⊕  | ⊕  | ⊖  | ⊕  | ⊖  | ⊕  | ⊖       |
| Moreno-Perez et al, 2022 [67]  | ⊕                    | ⊖  | ⊕  | ⊕  | ⊖  | ⊕  | ⊕  | ⊕       |
| Koç and Keseroğlu, 2021 [44]   | ⊕                    | ⊕  | ⊕  | ⊕  | ⊖  | ⊖  | ⊕  | ⊕       |
| Cinisliloglu et al, 2022 [54]  | ⊕                    | ⊕  | ⊕  | ⊖  | ⊕  | ⊕  | ⊖  | ⊕       |
| Schroeder et al, 2021 [62]     | ⊖                    | ⊕  | ⊖  | ⊖  | ⊕  | ⊖  | ⊕  | ⊖       |
| Salonia et al, 2022 [66]       | ⊖                    | ⊕  | ⊖  | ⊕  | ⊕  | ⊕  | ⊕  | ⊕       |
| Gul et al, 2021 [45]           | ⊕                    | ⊕  | ⊕  | ⊕  | ⊖  | ⊖  | ⊕  | ⊕       |
| van Zeggeren et al, 2021 [55]  | ⊖                    | ⊕  | ⊖  | ⊕  | ⊖  | ⊕  | ⊖  | ⊖       |
| Infante et al, 2021 [56]       | ⊕                    | ⊕  | ⊖  | ⊖  | ⊕  | ⊖  | ⊖  | ⊖       |
| Scropo et al, 2021 [73]        | ⊖                    | ⊕  | ⊕  | ⊕  | ⊕  | ⊖  | ⊕  | ⊕       |
| Di Stasi et al, 2022 [63]      | ⊕                    | ⊕  | ⊕  | ⊖  | ⊕  | ⊖  | ⊕  | ⊕       |
| Saad et al, 2022 [68]          | ⊕                    | ⊖  | ⊕  | ⊖  | ⊕  | ⊕  | ⊖  | ⊖       |
| Zheng et al, 2022 [57]         | ⊖                    | ⊕  | ⊖  | ⊖  | ⊕  | ⊖  | ⊕  | ⊖       |
| Vena et al, 2022 [58]          | ⊖                    | ⊕  | ⊕  | ⊖  | ⊕  | ⊕  | ⊖  | ⊕       |
| Huang et al, 2022 [74]         | ⊖                    | ⊕  | ⊖  | ⊖  | ⊕  | ⊕  | ⊕  | ⊖       |
| Karkin and Alma, 2021 [41]     | ⊖                    | ⊖  | ⊖  | ⊖  | ⊕  | ⊕  | ⊖  | ⊖       |
| Apaydin et al, 2022 [65]       | ⊖                    | ⊕  | ⊕  | ⊕  | ⊕  | ⊕  | ⊖  | ⊕       |
| Enikeev et al, 2022 [70]       | ⊕                    | ⊕  | ⊖  | ⊕  | ⊕  | ⊖  | ⊖  | ⊕       |
| Beltrame et al, 2022 [59]      | ⊕                    | ⊕  | ⊖  | ⊖  | ⊖  | ⊕  | ⊖  | ⊖       |
| Gonen et al, 2022 [69]         | ⊖                    | ⊕  | ⊕  | ⊕  | ⊖  | ⊖  | ⊕  | ⊖       |
| Baldassarri et al, 2021 [32]   | ⊕                    | ⊕  | ⊖  | ⊕  | ⊖  | ⊖  | ⊕  | ⊖       |
| Zhang et al, 2021 [34]         | ⊖                    | ⊕  | ⊖  | ⊕  | ⊖  | ⊕  | ⊕  | ⊕       |
| Peruzzu et al, 2021 [38]       | ⊖                    | ⊕  | ⊖  | ⊖  | ⊕  | ⊕  | ⊖  | ⊖       |
| Campos et al, 2021 [35]        | ⊕                    | ⊖  | ⊕  | ⊕  | ⊕  | ⊕  | ⊖  | ⊖       |
| Lanser et al, 2021 [47]        | ⊕                    | ⊕  | ⊖  | ⊖  | ⊕  | ⊖  | ⊕  | ⊕       |
| Fallerini et al, 2021 [37]     | ⊕                    | ⊕  | ⊖  | ⊖  | ⊖  | ⊖  | ⊕  | ⊖       |
| Ilias et al, 2022 [60]         | ⊕                    | ⊕  | ⊕  | ⊖  | ⊖  | ⊖  | ⊕  | ⊕       |
| Wong et al, 2021 [61]          | ⊖                    | ⊕  | ⊖  | ⊖  | ⊕  | ⊕  | ⊕  | ⊕       |
| Durcan et al, 2022 [43]        | ⊕                    | ⊕  | ⊕  | ⊖  | ⊖  | ⊕  | ⊕  | ⊕       |
| Vishvakarma et al, 2022 [33]   | ⊖                    | ⊖  | ⊖  | ⊖  | ⊕  | ⊖  | ⊖  | ⊖       |
| Welén et al, 2022 [39]         | ⊕                    | ⊕  | ⊕  | ⊖  | ⊕  | ⊕  | ⊖  | ⊕       |
| Li et al, 2022 [36]            | ⊖                    | ⊕  | ⊕  | ⊖  | ⊕  | ⊖  | ⊖  | ⊖       |
| Ghosh et al, 2022 [31]         | ⊖                    | ⊕  | ⊖  | ⊕  | ⊕  | ⊕  | ⊖  | ⊕       |

Domains:  
D1: bias due to confounding  
D2: bias arising from measurement of the exposure  
D3: bias in selection of participants into the study (or into the analysis)  
D4: bias due to post-exposure interventions  
D5: bias due to missing data  
D6: bias arising from measurement of the outcome  
D7: bias in selection of the reported result

Judgement  
⊕ Very high  
⊖ High  
⊖ Some concerns  
⊕ Low  
⊖ No information

Supplement Fig. 1. Risk Of Bias In Non-randomized Studies - of Exposure (ROBINS-E) assessment for all studies included in the systematic review.
