# Supplementary material for: The Complex Interplay between Serum Testosterone and the Clinical Course of Coronavirus Disease 19 Pandemic: A Systematic Review of Clinical and Preclinical Evidence
Source: PubMed Central journal article supplement — World J Mens Health. 2023 Jan 3;41(3):466–81. doi: 10.5534/wjmh.220143 (PMC10307667; doi:10.5534/wjmh.220143), 2023-01-03
Supplement: wjmh-41-466-s002.pdf [file wjmh-41-466-s002.pdf]

|       |                              | Risk of bias domains |    |    |    |    |    |    |         |
|-------|------------------------------|----------------------|----|----|----|----|----|----|---------|
|       |                              | D1                   | D2 | D3 | D4 | D5 | D6 | D7 | Overall |
| Study | Baldassarri et al, 2021 [32] | ⊗                    | ⊕  | ⊖  | ⊕  | ⊖  | ⊖  | ⊗  | ⊖       |
|       | Zhang et al, 2021 [34]       | ⊖                    | ⊕  | ⊖  | ⊗  | ⊖  | ⊗  | ⊗  | ⊗       |
|       | Peruzzu et al, 2021 [38]     | ⊖                    | ⊕  | ⊖  | ⊖  | ⊕  | ⊕  | ⊖  | ⊖       |
|       | Campos et al, 2021 [35]      | ⊕                    | ⊖  | ⊗  | ⊕  | ⊕  | ⊗  | ⊖  | ⊖       |
|       | Fallerini et al, 2021 [37]   | ⊕                    | ⊕  | ⊖  | ?  | ⊖  | ⊖  | ⊗  | ⊖       |
|       | Vishvakarma et al, 2022 [33] | ⊖                    | ⊖  | ?  | ?  | ⊕  | ⊖  | ⊖  | ⊖       |
|       | Welén et al, 2022 [39]       | ⊕                    | ⊕  | ⊕  | ⊖  | ⊕  | ⊕  | ⊖  | ⊕       |
|       | Li et al, 2022 [36]          | ⊖                    | ⊕  | ⊕  | ?  | ⊕  | ⊖  | ⊖  | ⊖       |
|       | Ghosh et al, 2022 [31]       | ⊖                    | ⊕  | ⊖  | ⊕  | ⊕  | ⊖  | ⊖  | ⊕       |

Domains:

D1: bias due to confounding  
 D2: bias arising from measurement of the exposure  
 D3: bias in selection of participants into the study (or into the analysis)  
 D4: bias due to post-exposure interventions  
 D5: bias due to missing data  
 D6: bias arising from measurement of the outcome  
 D7: bias in selection of the reported result

Judgement

⊗ Very high  
 ⊗ High  
 ⊖ Some concerns  
 ⊕ Low  
 ? No information

**Supplement Fig. 2.** Risk Of Bias In Non-randomized Studies - of Exposure (ROBINS-E) assessment for studies in the preclinical setting included in the systematic review.
