# Supplementary material for: The Complex Interplay between Serum Testosterone and the Clinical Course of Coronavirus Disease 19 Pandemic: A Systematic Review of Clinical and Preclinical Evidence
Source: PubMed Central journal article supplement — World J Mens Health. 2023 Jan 3;41(3):466–81. doi: 10.5534/wjmh.220143 (PMC10307667; doi:10.5534/wjmh.220143), 2023-01-03
Supplement: wjmh-41-466-s003.pdf [file wjmh-41-466-s003.pdf]

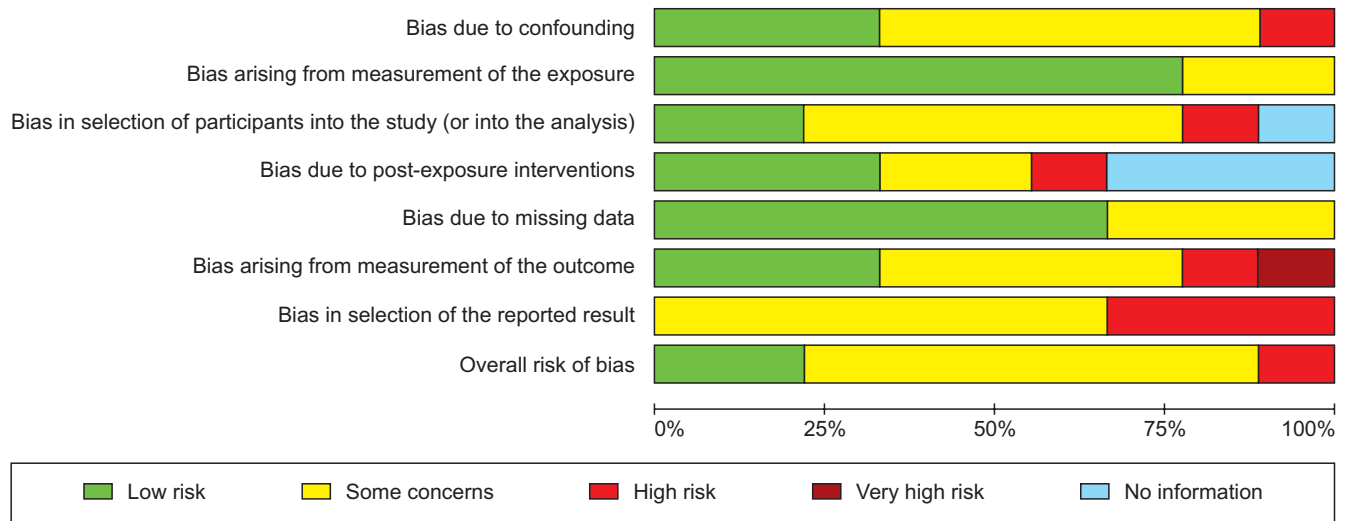

**Supplement Fig. 3.** Risk Of Bias In Non-randomized Studies - of Exposure (ROBINS-E) visualized with the *robvis* tool for studies in the preclinical setting included in the systematic review.
